# Supplementary material for: Molecular Identification of Bacteria Isolated from Marketed Sparus aurata and Penaeus indicus Sea Products: Antibiotic Resistance Profiling and Evaluation of Biofilm Formation
Source: MDPI journal article supplement (doi:10.3390/life13020548), 2023-02-16
Supplement: s1 [file s1]

# Molecular Identification of Bacteria Isolated from Marketed *Sparus aurata* and *Penaeus indicus* Sea Products: Antibiotic Resistance Profiling and Evaluation of Biofilm Formation

Mohammad A. Abdulhakeem <sup>1</sup>, Mousa Alreshidi <sup>1,2,\*</sup>, Fevzi Bardakci <sup>1</sup>, Walid Sabri Hamadou <sup>1</sup>, Vincenzo De Feo <sup>3</sup>, Emira Noumi <sup>1,4,\*</sup> and Mejdi Snoussi <sup>1,4</sup>

<sup>1</sup> Department of Biology, College of Science, University of Ha'il, Ha'il P.O. Box 2440, Saudi Arabia

<sup>2</sup> Molecular Diagnostics and Personalized Therapeutics Unit, University of Hail, Hail P.O. Box 2440, Saudi Arabia

<sup>3</sup> Department of Pharmacy, University of Salerno, Via Giovanni Paolo II, 132, Fisciano, 84084 Salerno, Italy

<sup>4</sup> Laboratory of Genetics, Biodiversity and Valorization of Bio-Resources (LR11ES41), Higher Institute of Biotechnology of Monastir, University of Monastir, Avenue Tahar Haddad, BP74, Monastir 5000, Tunisia

\* Correspondence: mo.alreshidi@uoh.edu.sa (M.A.); eb.noumi@uoh.edu.sa (E.N.)

**Supplementary material Table S1.** Antibiotic susceptibility of 18 Gram negative bacteria to 26 antibiotics and MARI calculation.

| Code                                                                                                                                                                | Bacteria Tested         | 1  | 2   | 3   | 4  | 5  | 6  | 7  | 8   | 9   | 10 | 11  | 12  | 13  | 14  | 15 | 16 | 17  | 18 | 19 | 20  | 21  | 22  | 23  | 24  | 25 | 26  | MARI  |
|---------------------------------------------------------------------------------------------------------------------------------------------------------------------|-------------------------|----|-----|-----|----|----|----|----|-----|-----|----|-----|-----|-----|-----|----|----|-----|----|----|-----|-----|-----|-----|-----|----|-----|-------|
| P <sub>1</sub>                                                                                                                                                      | <i>V. natrigens</i>     | S  | S   | R   | R  | S  | S  | R  | R   | R   | S  | R   | R   | R   | R   | R  | R  | R   | R  | S  | R   | S   | S   | S   | R   | R  | S   | 0.615 |
| P <sub>14</sub>                                                                                                                                                     | <i>V. natrigens</i>     | S  | S   | R   | R  | R  | R  | R  | R   | R   | I  | R   | R   | R   | R   | R  | R  | R   | I  | S  | S   | S   | S   | R   | R   | R  | S   | 0.423 |
| SA <sub>11</sub>                                                                                                                                                    | <i>V. natrigens</i>     | S  | S   | R   | S  | R  | S  | R  | R   | R   | I  | R   | R   | R   | R   | R  | R  | R   | R  | S  | R   | S   | S   | R   | R   | R  | S   | 0.538 |
| SA <sub>13</sub>                                                                                                                                                    | <i>V. natrigens</i>     | S  | S   | S   | R  | I  | I  | S  | S   | S   | R  | S   | R   | R   | R   | I  | I  | R   | R  | I  | R   | S   | I   | R   | R   | R  | S   | 0.615 |
| SA <sub>27</sub>                                                                                                                                                    | <i>V. natrigens</i>     | S  | S   | R   | I  | R  | I  | R  | R   | R   | I  | R   | S   | R   | R   | R  | I  | R   | R  | S  | R   | R   | S   | S   | R   | S  | S   | 0.653 |
| P <sub>9</sub>                                                                                                                                                      | <i>V. harveyi</i>       | S  | S   | R   | S  | I  | S  | S  | R   | R   | S  | R   | S   | R   | R   | S  | I  | R   | R  | I  | R   | S   | S   | S   | R   | S  | S   | 0.5   |
| SA <sub>26</sub>                                                                                                                                                    | <i>V. harveyi</i>       | R  | S   | R   | S  | I  | R  | I  | R   | I   | S  | R   | R   | R   | R   | R  | I  | R   | I  | S  | R   | S   | S   | R   | R   | S  | S   | 0.384 |
| P <sub>2</sub>                                                                                                                                                      | <i>V. alginolyticus</i> | S  | S   | R   | I  | R  | R  | R  | R   | R   | R  | R   | R   | R   | R   | I  | R  | R   | R  | S  | R   | S   | S   | S   | R   | R  | S   | 0.615 |
| P <sub>12</sub>                                                                                                                                                     | <i>V. hyuganesis</i>    | S  | S   | R   | S  | R  | S  | R  | R   | R   | S  | R   | S   | R   | R   | I  | S  | R   | S  | S  | R   | S   | S   | S   | R   | S  | S   | 0.423 |
| Total R (%)                                                                                                                                                         |                         | 11 | 0   | 89  | 33 | 56 | 33 | 67 | 89  | 78  | 22 | 89  | 67  | 100 | 100 | 56 | 44 | 100 | 67 | 0  | 89  | 11  | 0   | 44  | 100 | 56 | 0   |       |
| Total I (%)                                                                                                                                                         |                         | 0  | 0   | 0   | 22 | 33 | 22 | 22 | 0   | 11  | 33 | 0   | 0   | 0   | 0   | 33 | 44 | 0   | 22 | 33 | 0   | 0   | 11  | 0   | 0   | 0  | 0   |       |
| Total S (%)                                                                                                                                                         |                         | 89 | 100 | 11  | 44 | 11 | 44 | 11 | 11  | 11  | 44 | 11  | 33  | 0   | 0   | 11 | 11 | 0   | 11 | 77 | 11  | 89  | 89  | 56  | 0   | 44 | 100 |       |
| SA <sub>1</sub>                                                                                                                                                     | <i>A. veronii</i>       | I  | S   | R   | I  | R  | R  | R  | R   | I   | S  | R   | R   | R   | R   | R  | R  | R   | R  | I  | R   | S   | S   | R   | R   | R  | S   | 0.653 |
| SA <sub>15</sub>                                                                                                                                                    | <i>A. veronii</i>       | R  | S   | S   | S  | R  | I  | S  | R   | R   | R  | R   | R   | R   | R   | I  | S  | R   | R  | S  | R   | S   | S   | S   | R   | S  | R   | 0.538 |
| SA <sub>17</sub>                                                                                                                                                    | <i>A. veronii</i>       | R  | S   | S   | S  | I  | S  | S  | R   | R   | I  | R   | R   | R   | R   | R  | I  | R   | S  | R  | R   | S   | S   | S   | R   | S  | S   | 0.461 |
| SA <sub>25</sub>                                                                                                                                                    | <i>A. veronii</i>       | S  | S   | R   | R  | R  | R  | I  | R   | R   | R  | R   | R   | R   | R   | R  | R  | R   | R  | S  | R   | S   | S   | S   | R   | R  | S   | 0.692 |
| SA <sub>31</sub>                                                                                                                                                    | <i>A. veronii</i>       | S  | S   | S   | S  | R  | I  | I  | R   | R   | R  | R   | R   | R   | R   | R  | R  | R   | R  | S  | R   | S   | I   | S   | R   | S  | I   | 0.538 |
| Total R (%)                                                                                                                                                         |                         | 40 | 0   | 40  | 20 | 80 | 40 | 20 | 100 | 80  | 60 | 100 | 100 | 100 | 100 | 80 | 60 | 100 | 80 | 20 | 100 | 0   | 0   | 20  | 100 | 40 | 20  |       |
| Total I (%)                                                                                                                                                         |                         | 20 | 0   | 60  | 20 | 20 | 40 | 40 | 0   | 20  | 20 | 0   | 0   | 0   | 0   | 20 | 20 | 0   | 0  | 20 | 0   | 0   | 20  | 0   | 0   | 0  | 20  |       |
| Total S (%)                                                                                                                                                         |                         | 40 | 100 | 0   | 60 | 0  | 20 | 40 | 0   | 0   | 20 | 0   | 0   | 0   | 0   | 0  | 20 | 0   | 20 | 60 | 0   | 100 | 80  | 100 | 0   | 60 | 60  |       |
| SA <sub>3</sub>                                                                                                                                                     | <i>P. piscicida</i>     | S  | S   | R   | S  | S  | I  | S  | R   | R   | S  | R   | R   | R   | R   | R  | R  | R   | R  | I  | R   | S   | S   | I   | R   | R  | I   | 0.538 |
| SA <sub>5</sub>                                                                                                                                                     | <i>P. damsela</i>       | S  | S   | R   | I  | I  | R  | R  | R   | R   | S  | R   | R   | R   | R   | R  | R  | R   | S  | I  | R   | S   | S   | R   | R   | R  | S   | 0.615 |
| P <sub>13</sub>                                                                                                                                                     | <i>S. indica</i>        | I  | I   | R   | R  | R  | R  | R  | R   | R   | I  | R   | R   | R   | R   | S  | R  | R   | R  | S  | R   | S   | S   | S   | R   | R  | S   | 0.653 |
| P <sub>5</sub>                                                                                                                                                      | <i>M. morganii</i>      | S  | S   | R   | R  | I  | R  | R  | R   | R   | S  | R   | R   | R   | R   | S  | I  | R   | I  | I  | S   | S   | S   | S   | R   | S  | S   | 0.423 |
| Total R (%)                                                                                                                                                         |                         | 0  | 0   | 100 | 50 | 25 | 75 | 75 | 100 | 100 | 0  | 100 | 100 | 100 | 100 | 50 | 75 | 100 | 50 | 0  | 75  | 0   | 0   | 25  | 100 | 75 | 0   |       |
| Total I (%)                                                                                                                                                         |                         | 25 | 25  | 0   | 25 | 50 | 25 | 0  | 0   | 0   | 25 | 0   | 0   | 0   | 0   | 0  | 25 | 0   | 25 | 75 | 0   | 0   | 0   | 25  | 0   | 0  | 25  |       |
| Total S (%)                                                                                                                                                         |                         | 75 | 75  | 0   | 25 | 25 | 0  | 25 | 0   | 0   | 75 | 0   | 0   | 0   | 0   | 50 | 0  | 0   | 25 | 25 | 25  | 100 | 100 | 50  | 0   | 25 | 75  |       |
| R for All G-                                                                                                                                                        |                         | 17 | 0   | 78  | 33 | 56 | 44 | 56 | 94  | 83  | 28 | 94  | 83  | 100 | 100 | 61 | 56 | 100 | 67 | 6  | 89  | 6   | 0   | 33  | 100 | 61 | 6   |       |
| 1-NA 2-NOR 3-TMO 4-FOS 5-ETP6-CIP 7-F 8-AK 9-GEN 10-TET 11-AMP 12-MXF 13-MEM 14-TIC 15-PPT 16-CTX 17-TGC 18-E 19-C 20-AUG 21-TOB 22-SXT 23-CZD 24-CPN 25-CST 26-NET |                         |    |     |     |    |    |    |    |     |     |    |     |     |     |     |    |    |     |    |    |     |     |     |     |     |    |     |       |

**Supplementary material Table S2.** Antibiotic susceptibility of *V. fluvialis*, *B. cereus* and *S. epidermidis* to 18 antibiotics and MARI calculation.

| Code             | Bacteria              | 1   | 2    | 3     | 4     | 5     | 6     | 7     | 8      | 9    | 10     | 11     | 12     | 13     | 14     | 15 | 16 | 17 | 18  | MARI  |
|------------------|-----------------------|-----|------|-------|-------|-------|-------|-------|--------|------|--------|--------|--------|--------|--------|----|----|----|-----|-------|
| SA <sub>7</sub>  | <i>S. epidermidis</i> | S   | S    | I     | I     | I     | I     | R     | R      | I    | R      | S      | R      | S      | S      | R  | I  | R  | S   | 0.333 |
| SA <sub>21</sub> | <i>V. fluvialis</i>   | S   | S    | R     | S     | I     | R     | R     | R      | S    | S      | S      | S      | I      | R      | S  | I  | S  | S   | 0.277 |
| SA <sub>9</sub>  | <i>B. cereus</i>      | S   | S    | I     | S     | R     | S     | R     | R      | I    | R      | S      | R      | S      | R      | R  | R  | R  | S   | 0.5   |
| Total R (%)      |                       | 0   | 0    | 33    | 0     | 33    | 33    | 100   | 100    | 0    | 67     | 0      | 67     | 0      | 67     | 67 | 33 | 67 | 0   |       |
| Total I (%)      |                       | 0   | 0    | 67    | 33    | 67    | 33    | 0     | 0      | 67   | 0      | 0      | 0      | 33     | 0      | 0  | 67 | 0  | 0   |       |
| Total S (%)      |                       | 100 | 100  | 0     | 67    | 0     | 33    | 0     | 0      | 33   | 33     | 100    | 33     | 67     | 33     | 33 | 0  | 33 | 100 |       |
| 1-NOR            | 2-FOS                 | 3-F | 4-AK | 5-GEN | 6-TET | 7-AMP | 8-MXF | 9-RAM | 10-PTN | 11-E | 12-AUG | 13-TOB | 14-SXT | 15-LZD | 16-CPN |    |    |    |     |       |
